# Supplementary material
Source: Springer Nature journal article supplement (http://www.springermedizin.de/resource/supplementary/13019_2006_4_MOESM1_ESM.pdf/9637110)

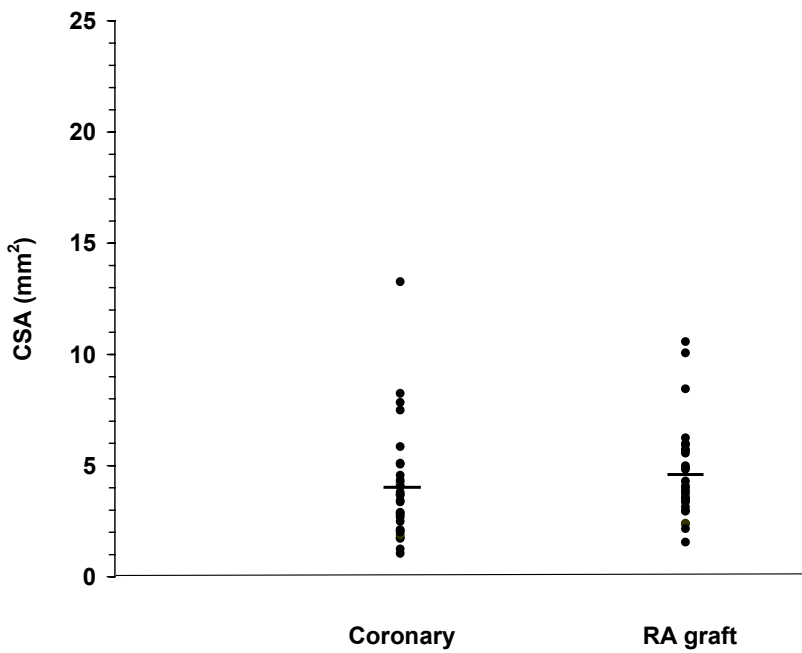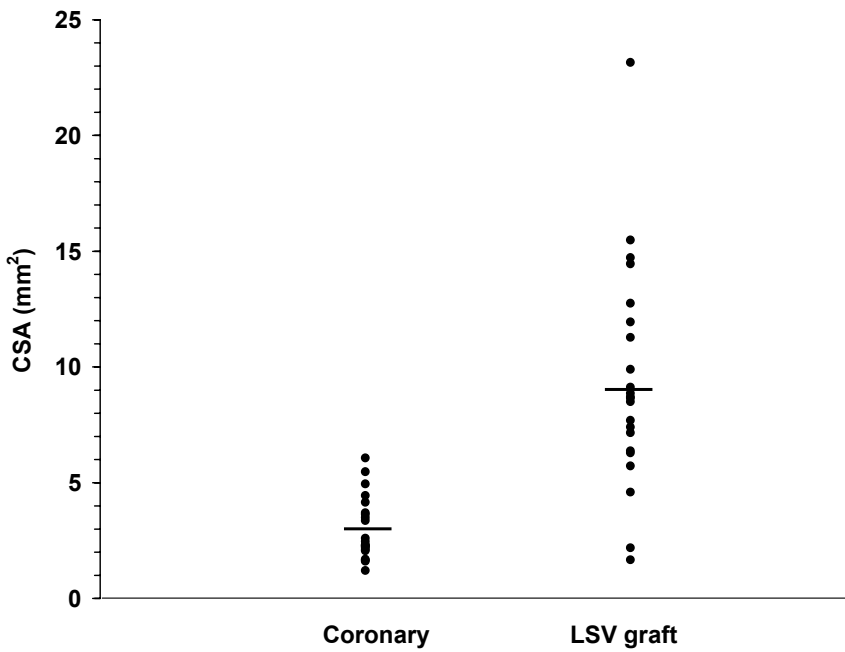

Supplement: MOESM1 [file 9637110]
